# Supplementary material for: Synthesis of enzyme-responsive phosphoramidate dendrimers for cancer drug delivery
Source: Royal Society of Chemistry journal article supplement (doi:10.1039/c7py01492a), 2017-12-18
Supplement: c7py01492a1.pdf [file c7py01492a1.pdf]

## Supporting Information

### Synthesis of Enzyme-Responsive Phosphoramidate Dendrimers for Cancer Drug Delivery

Zhen Zhang, Yongcun Zhou, Zhuxian Zhou\*, Ying Piao, Nagendra Kalva, Xiangrui Liu, Jianbin Tang, and  
Youqing Shen\*

Center for Bionanoengineering and State Key Laboratory for Chemical Engineering,  
Department of Chemical and Biological Engineering, Zhejiang University, Hangzhou 310027,  
China. Email: zhouzx@zju.edu.cn or shenyq@zju.edu.cn

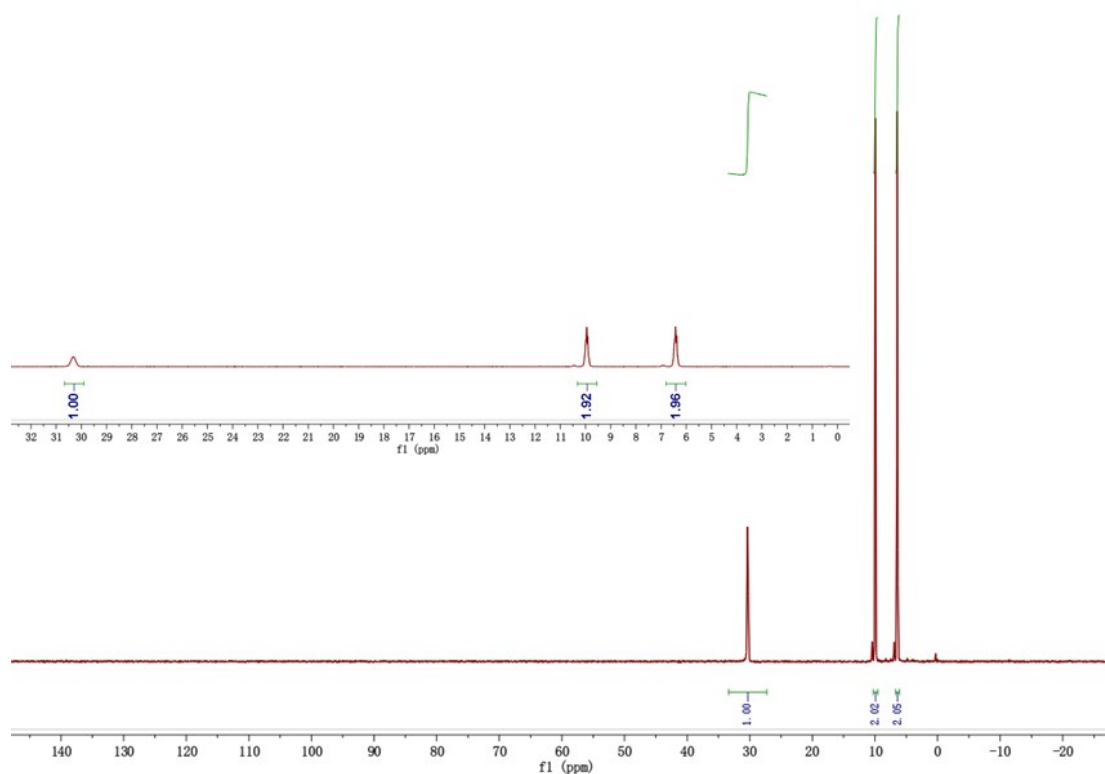

Fig. S1.  $^{31}\text{P}$  NMR (500 MHz,  $\text{CDCl}_3$ , no decoupling) of MA-PP monomer

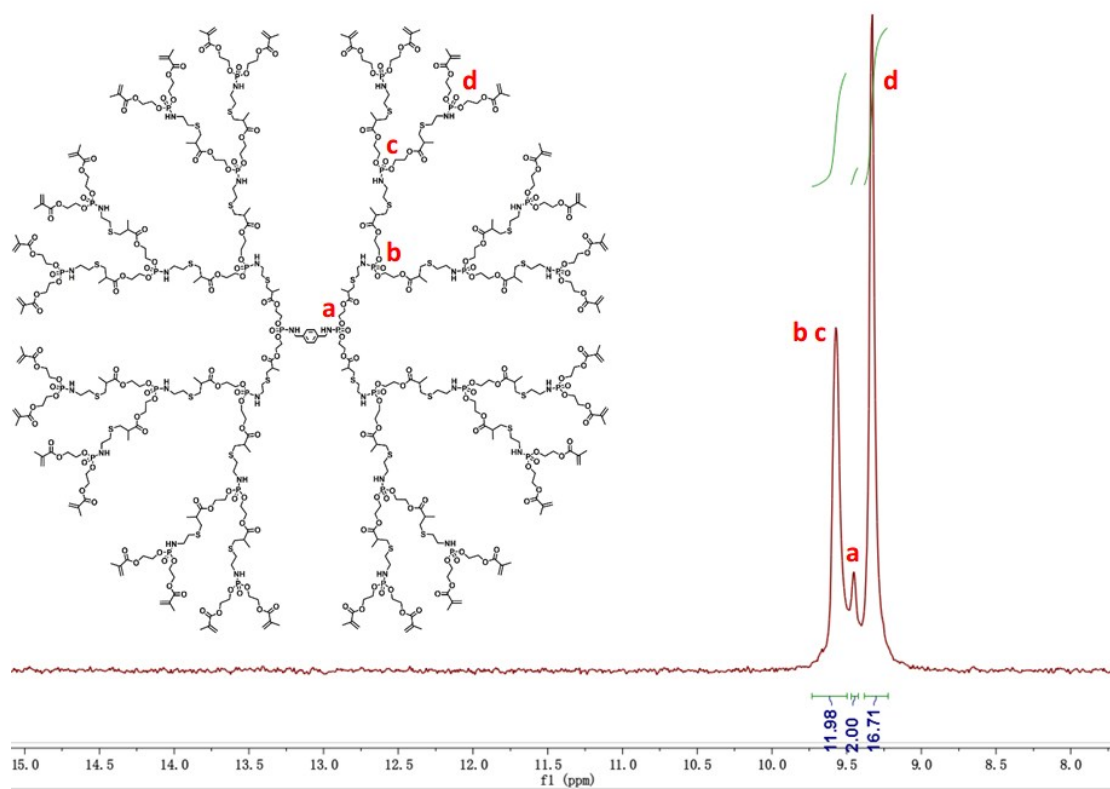

Fig. S2.  $^{31}\text{P}$  NMR (500 MHz,  $\text{CDCl}_3$ , no decoupling) of PAD-G4
